# Supplementary material for: DNA-directed formation of plasmonic core–satellite nanostructures for quantification of hepatitis C viral RNA
Source: Royal Society of Chemistry journal article supplement (doi:10.1039/d4sc00891j), 2024-01-01
Supplement: d4sc00891j1.pdf [file d4sc00891j1.pdf]

## Supplementary Information

**Table S1.** A list of all oligonucleotide sequences used for the experiments. Colored domains indicate complementarity.

| DNA Sequence Name   | Sequence                                                                                        | Nucleotide Length | GC content | Molecular Weight(g/mol) |
|---------------------|-------------------------------------------------------------------------------------------------|-------------------|------------|-------------------------|
| H1 Unmodified (Gel) | GGAGTGGT-TCATGGT-GGAGTGTC-GAGAGAAC-GTGATGAA-GACACTCC-ACCATGA                                    | 54                | 50 %       | 16823.9                 |
| H 1 5' Thiol(AuNP)  | 5ThioMC6-D/iSp18/GGAGTGGT-TCATGGT-GGAGTGTC-GAGAGAAC-GTGATGAA-GACACTCC-ACCATGA                   | 54                | 50 %       | 17496.5                 |
| FAM-H1-quencher     | GGAGTGGT/i6-FAMK/TCATGGT-GGAGTGTC-GAGAGAAC-GTGATGAA-GACACTCC-ACCATGA/3IABkFQ/                   | 54                | 50%        | 18120.0                 |
| H2 Unmodified(Gel)  | TCATGGT-GGAGTGTC-TTCATCAC-GTTCTCTC-ATCACTCC-CTTGTCTC-GAGAGAAC-GTGATGAA-ACCATGA                  | 70                | 47 %       | 21480.9                 |
| H2 5' Thiol(AuNP)   | 5ThioMC6-D/iSp18/TCATGGT-GGAGTGTC-TTCATCAC-GTTCTCTC-ATCACTCC-CTTGTCTC-GAGAGAAC-GTGATGAA-ACCATGA | 70                | 47 %       | 22153.6                 |
| H3 Unmodified(Gel)  | GTTCTCTC-GAGACAAG-GGAGTGAT-GACACTCC-ACCATGA-ATCACTCC-CTTGTCTC                                   | 55                | 51 %       | 16805.9                 |
| H3 5' Thiol(AuNP)   | 5ThioMC6-D/iSp18/GTTCTCTC-GAGACAAG-GGAGTGAT-GACACTCC-ACCATGA-ATCACTCC-CTTGTCTC                  | 55                | 51 %       | 17478.6                 |
| H3-quencher         | GTTCTCTC-GAGACAAG-GGAGTGAT-GACACTCC-ACCATGA/BHQ1/ATCACTCC-CTTGTCTC                              | 55                | 51 %       | 17766.8                 |
| HCV RNA             | GACACUCC-ACCAUGA-AUCACUCC                                                                       | 23                | 52 %       | 6841.4                  |

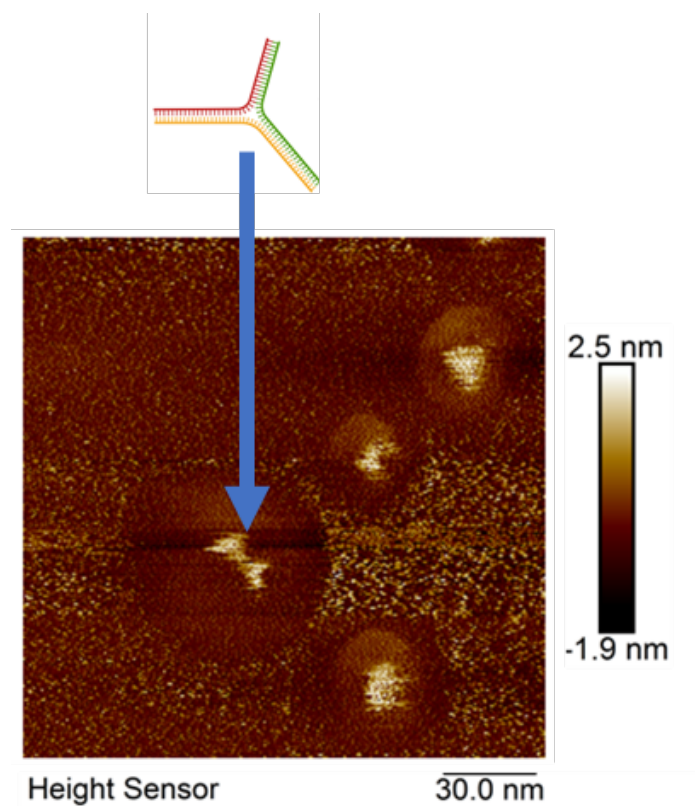

**Figure S1.** AFM image of 3-way junction CHA product formation. The sample was prepared by mixing the CHA reaction in  $1 \times$  TAE/Mg buffer (40 mM Tris, 20 mM acetic acid, 2 mM EDTA, 12.5 mM  $\text{MgCl}_2$ , pH = 7.5) before depositing on mica treated with 10 mM  $\text{NiCl}_2$ . The scale Bar is 30 nm. The image area is  $200 \times 200 \text{ nm}^2$ . Z range is 4.4 nm

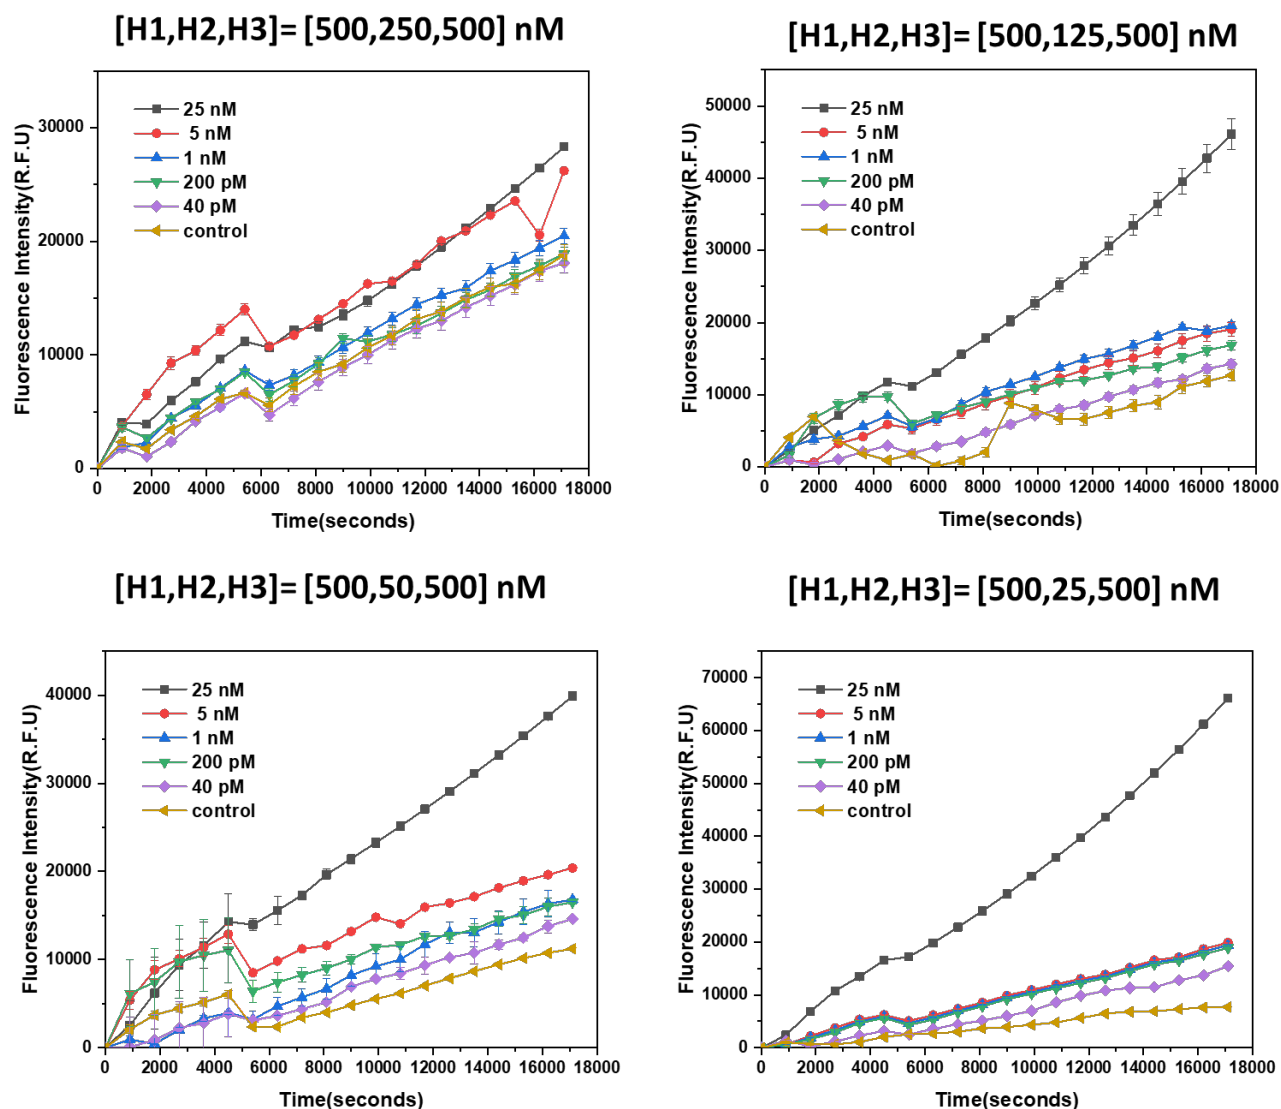

**Figure S2.** Fluorescence spectroscopy for optimizing the concentration of H2. For all experiments, H1 and H3 concentrations were kept at 500 nM. H2 concentrations were varied as follows: 25, 50, 125, and 250 nM. Clear discrimination between the control and the lowest assayed concentration target at 40 pM can be seen for H2 concentrations of 25 and 50 nM.

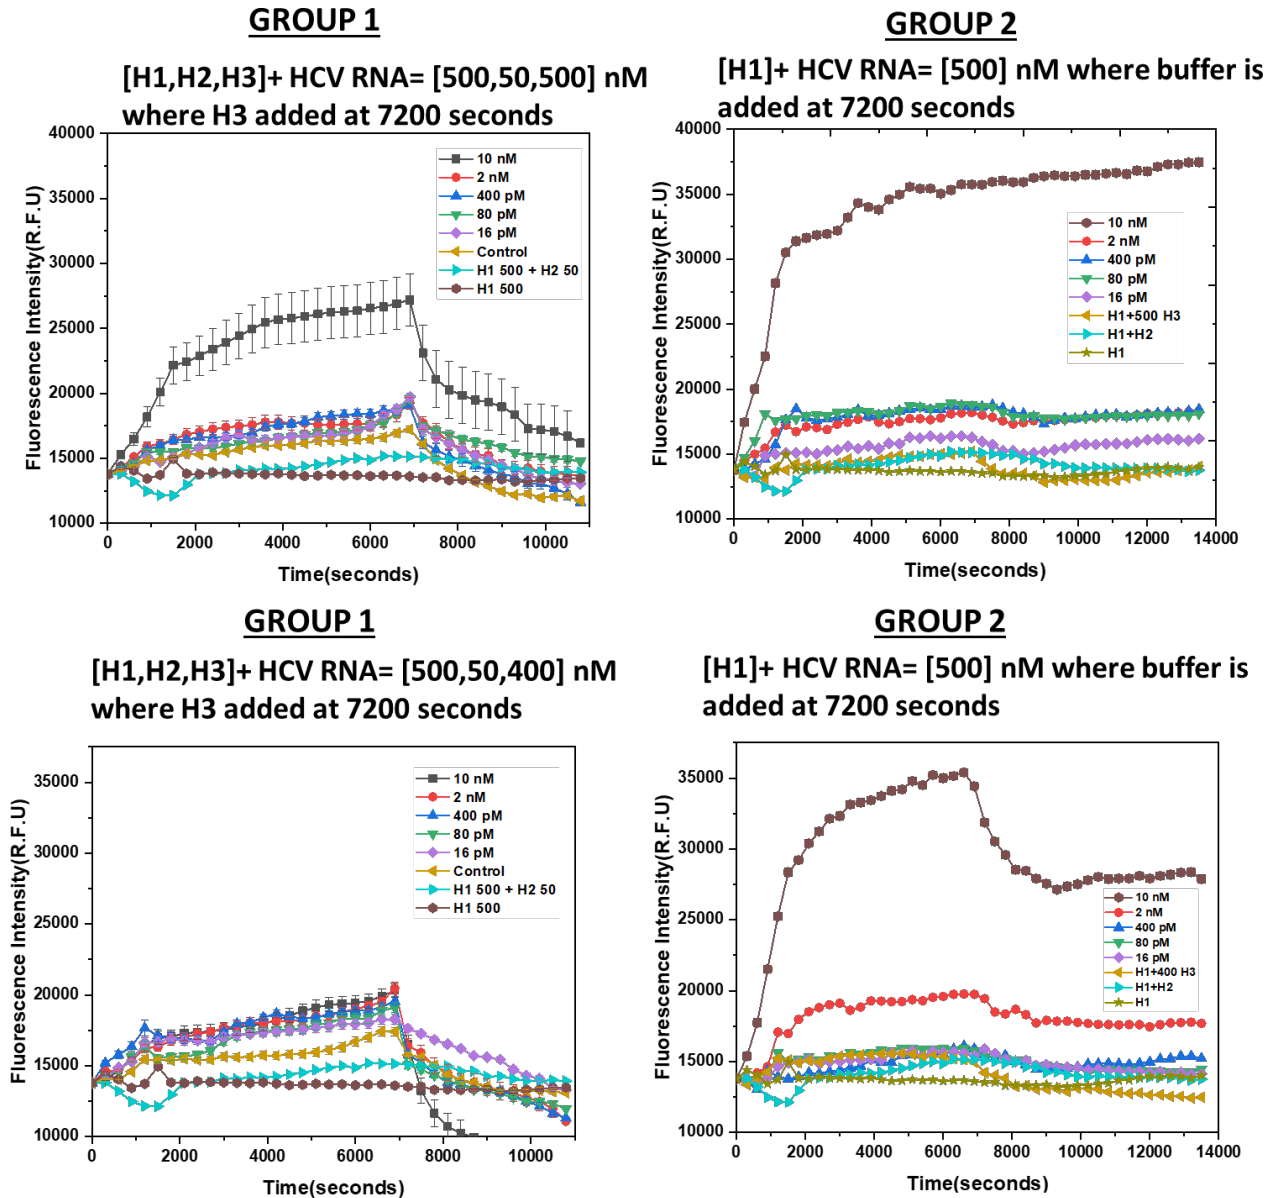

**Figure S3.** Fluorescence spectroscopy for determining the appropriate concentration of H3. **Group 1-** 500 nM H1 +50 nM H2 + HCV RNA concentrations + 500 nM H3-quencher (**top**), 500 nM H1 +50 nM H2 + HCV RNA concentrations + 400 nM H3-quencher (**bottom**). **Group 2-** 500 nM H1+ HCV RNA concentrations+ water +buffer (500 nM and 400 nM H3) (represented by the gold spectrum at **top** and **bottom** respectively). In the case of group 1, H3, buffer and water are added at 7200 seconds. The larger precipitous drop in fluorescence in group 1 indicates target recycling.

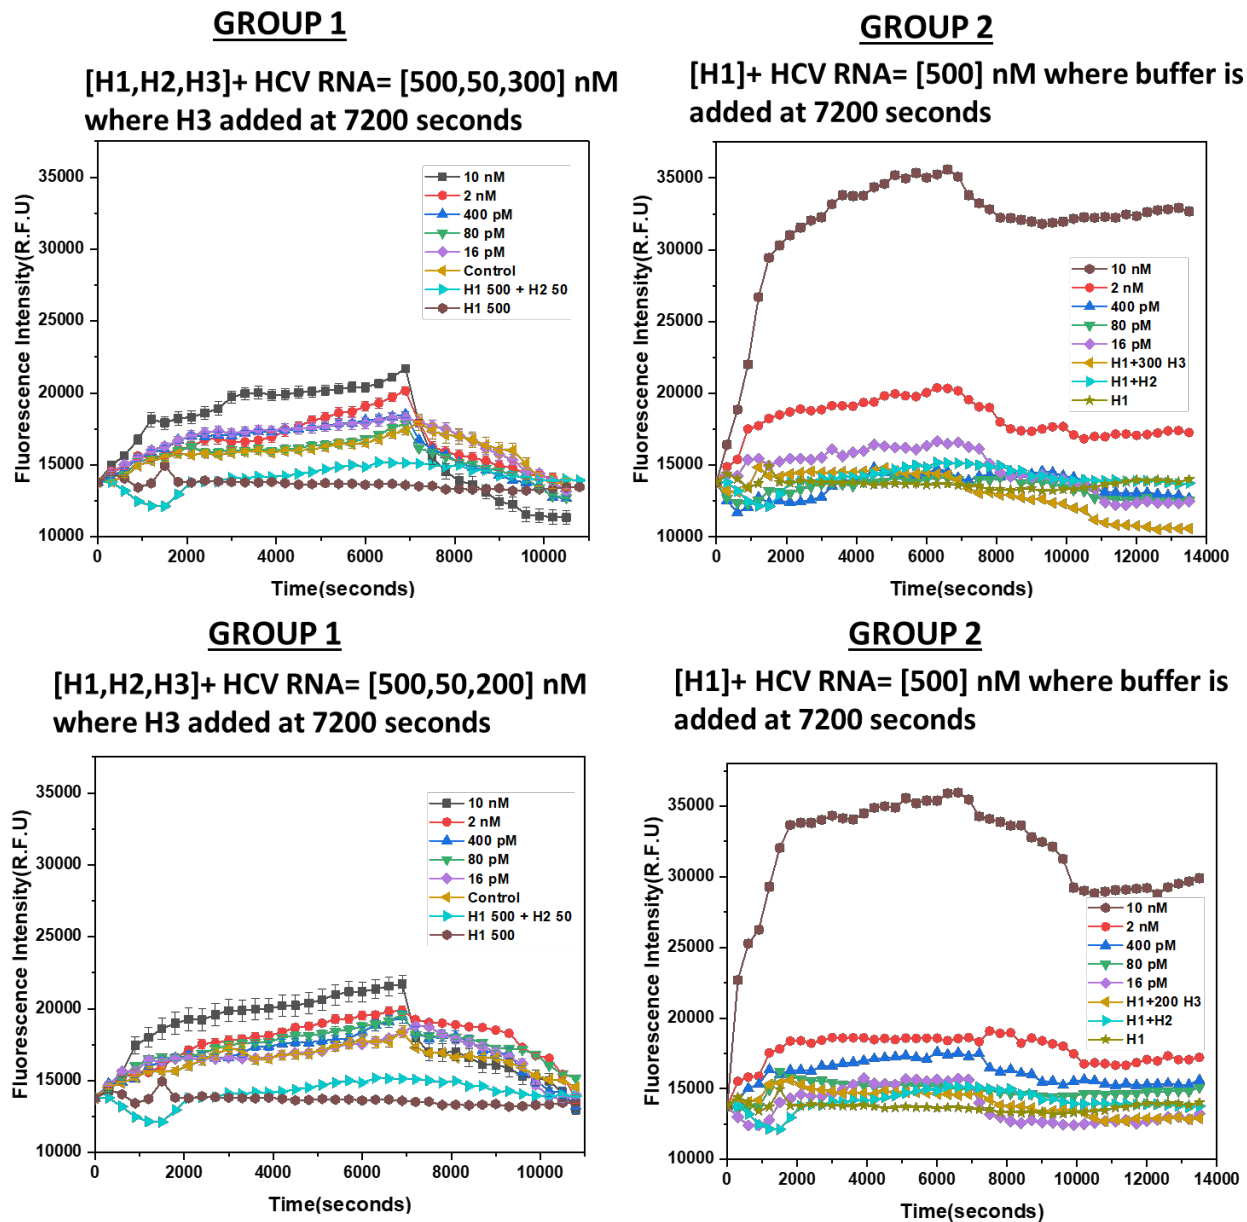

**Figure S4.** Fluorescence spectroscopy for determining the appropriate concentration of H3.  
**Group 1-** 500 nm H1 +50 nM H2 + HCV RNA concentrations + 300 nM H3-quencher (**top**),  
 500 nm H1 +50 nM H2 + HCV RNA concentrations + 200 nM H3-quencher (**bottom**). **Group**  
**2-** 500 nM H1+ HCV RNA concentrations + water + buffer (300 nM, 200 nM H3) (represented  
 by the gold spectrum at **top** and **bottom** respectively). In the case of group 1, H3, buffer and  
 water are added at 7200 seconds. The larger precipitous drop in fluorescence in group 1 indicates  
 target recycling.

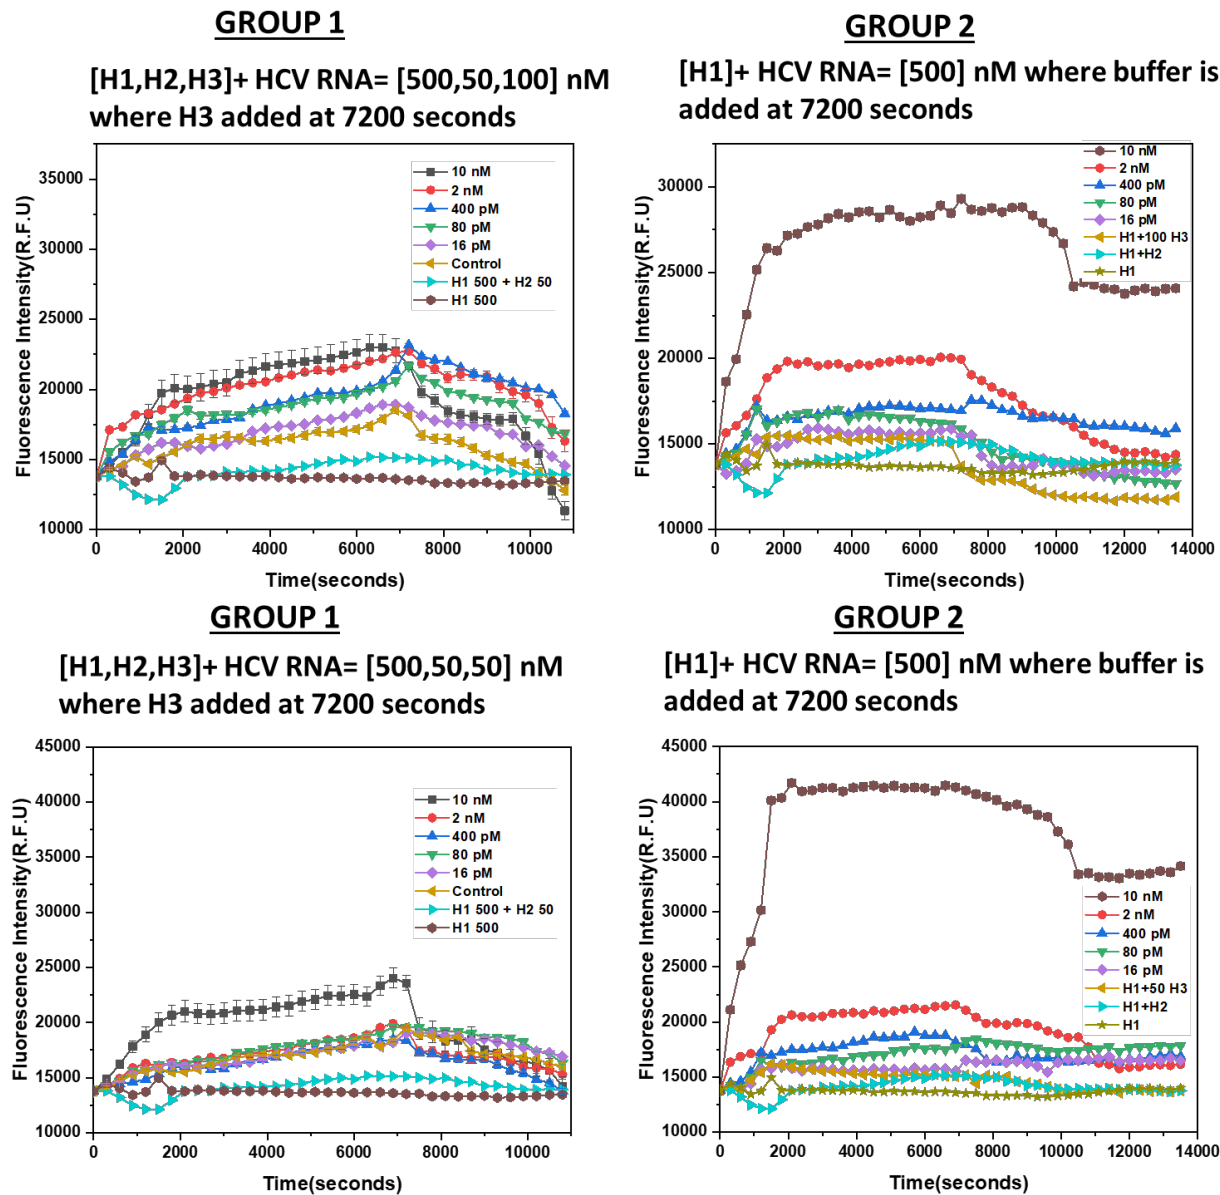

**Figure S5.** Fluorescence spectroscopy for determining the appropriate concentration of H3. **Group 1-** 500 nm H1 +50 nM H2 + HCV RNA concentrations + 100 nM H3-quencher (**top**), 500 nm H1 +50 nM H2 + HCV RNA concentrations + 50 nM H3-quencher (**bottom**). **Group 2-** 500 nm H1+ HCV RNA concentrations+ water +buffer (100 nM, 50 nM H3) (represented by the gold spectrum at **top** and **bottom** respectively). In the case of group 1, H3, buffer and water are added at 7200 seconds. The larger precipitous drop in fluorescence in group 1 indicates target recycling.

**[H1,H2,H3]+ HCV RNA= [500,50,500] nM**  
**where H3-quencher added at 7200 seconds**

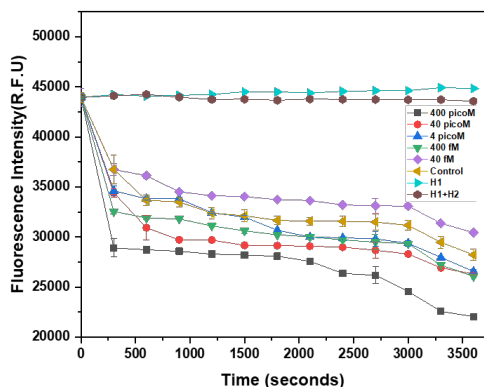

**[H1,H2,H3]+ HCV RNA= [500,50,400] nM**  
**where H3-quencher added at 7200 seconds**

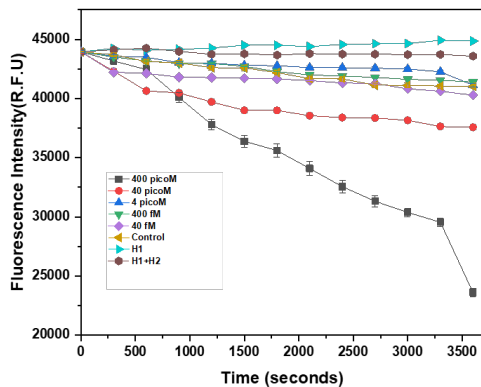

**[H1,H2,H3]+ HCV RNA= [500,50,300] nM**  
**where H3-quencher added at 7200 seconds**

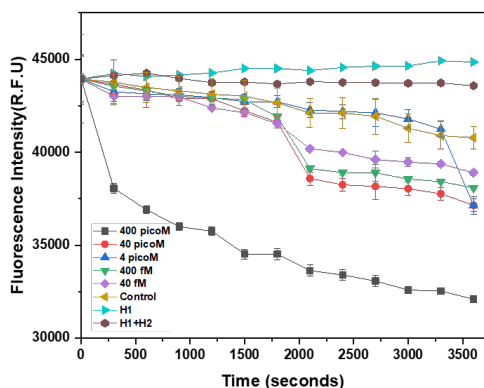

**[H1,H2,H3]+ HCV RNA= [500,50,200] nM**  
**where H3-quencher added at 7200 seconds**

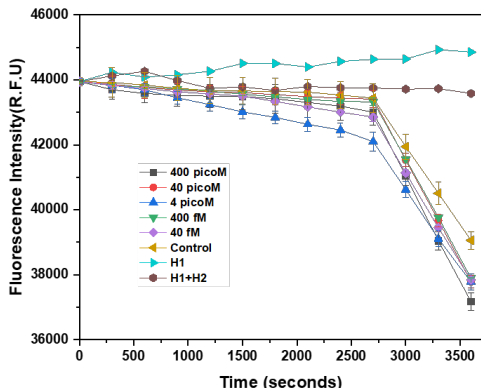

**[H1,H2,H3]+ HCV RNA= [500,50,100] nM**  
**where H3-quencher added at 7200 seconds**

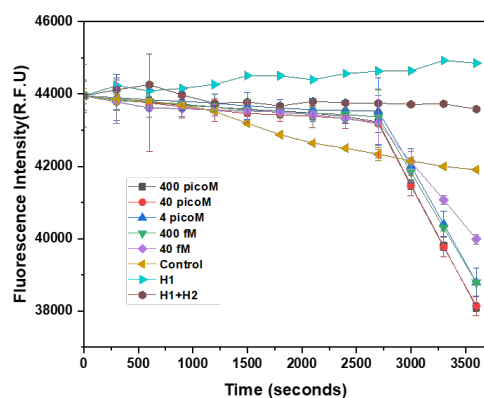

**[H1,H2,H3]+ HCV RNA= [500,50,50] nM**  
**where H3-quencher added at 7200 seconds**

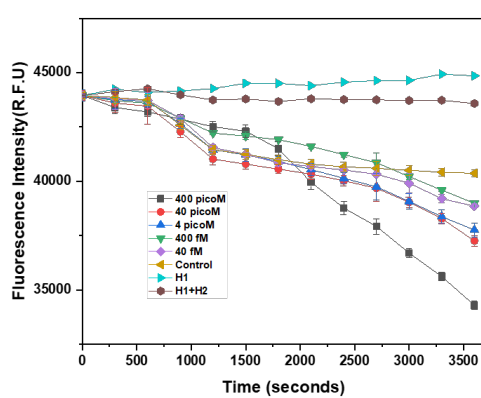

**Figure S6.** Fluorescence spectroscopy quantification towards LOD determination for HCV RNA concentrations (400 pM - 40 fM, 10-fold dilutions). H1 and H2 are present in concentrations of 500 nM and 50 nM respectively. H3 concentrations of 300 and 400 nM (highlighted in red) appear to provide the best discrimination.

## DLS characterization of core satellite nanoparticles

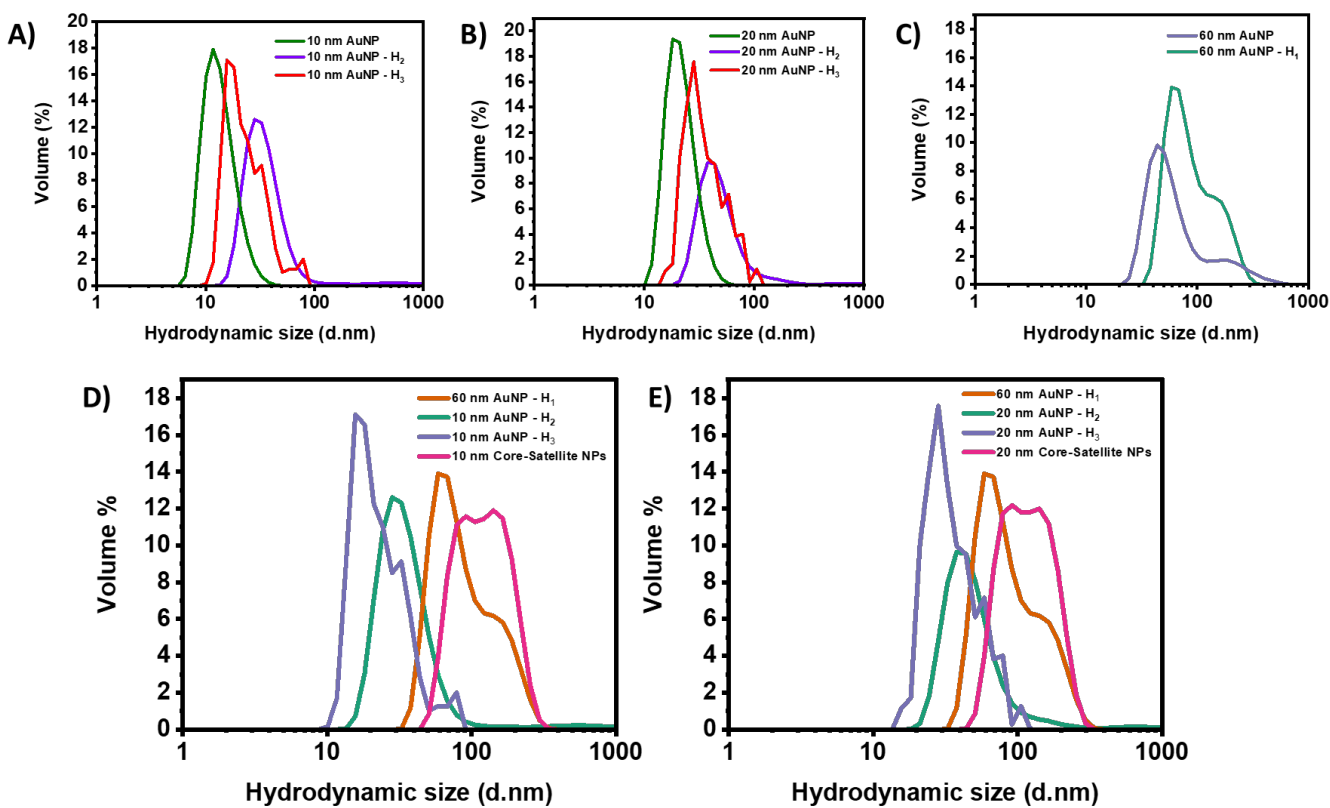

**Figure S7.** DLS characterization of core (60 nm), satellite (10 and 20 nm) and core-satellite assemblies. A) 10 nm satellite particles before (green) and after the addition of H<sub>2</sub> (purple) and H<sub>3</sub> (red). B) 20 nm satellite particles before (green) and after the addition of H<sub>2</sub> (purple) and H<sub>3</sub> (red). C) 60 nm core particles before (purple) and after the addition of H<sub>1</sub> (green). D) Comparison of individual core, satellite particles before reaction- 60 nm-H<sub>1</sub> (orange), 10 nm-H<sub>2</sub> (green), 10 nm-H<sub>3</sub> (purple) with the 60-10 nm core satellite assembly (pink). E) Comparison of individual core, satellite particles before reaction- 60 nm-H<sub>1</sub> (orange), 20 nm-H<sub>2</sub> (green), 20 nm-H<sub>3</sub> (purple) with the 60-20 nm core satellite assembly (pink).

**Qualitative colorimetric data upon completion of 3wJ CHA of core-satellite nanostructures**

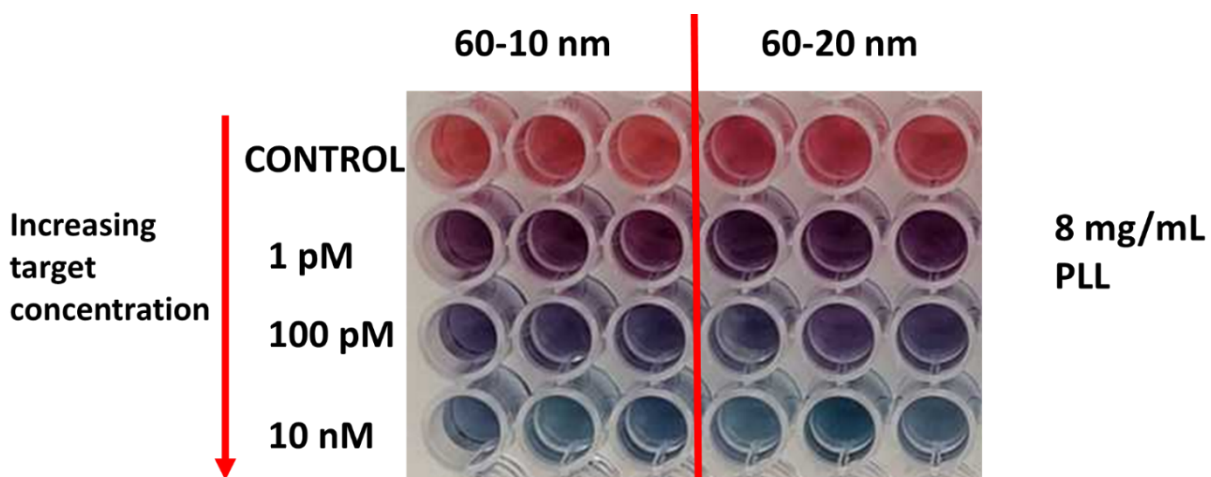

**Figure S8.** Visual representation of 3-way junction CHA for the 60-10 & 60-20 nm core-satellite assemblies in a clear 96 well plate. An increase in blue color corresponds to an increase in core-satellite assemblies and a decrease in nanoparticle distance which happens with increasing HCV RNA target concentrations<sup>10</sup>. H1, H2, and H3 were present in 500, 50, and 400 nM respectively with target concentrations (0, 1 pM, 100 pM, and 10 nM).
